# Supplementary material for: Nitrile formation via dichlorocarbene insertion into the Si–N bond of Ln(iii) bis(trimethylsilyl)amide complexes
Source: Royal Society of Chemistry journal article supplement (doi:10.1039/d2cc04538a), 2022-01-01
Supplement: d2cc04538a1.pdf [file d2cc04538a1.pdf]

## Supporting Information

### **Nitrile formation via dichlorocarbene insertion into the Si-N bond of Ln(III) bis(trimethylsilyl)amide complexes**

Yangjuan Li, Yu Gong \*

Department of Radiochemistry, Shanghai Institute of Applied Physics, Chinese

Academy of Sciences, Shanghai, 201800, China.

\*E-mail: [gongyu@sinap.ac.cn](mailto:gongyu@sinap.ac.cn)

## Contents

### I. Experimental Procedures

### II. Characterization

**Fig. S1.**  $^1\text{H}$  NMR ( $\text{C}_6\text{D}_6$ ) spectrum of the reaction products of  $\text{Eu}[\text{N}(\text{SiMe}_3)_2]_3$  with styrene and  $\text{CDCl}_3$  (1:1:1) at room temperature in n-hexane.

**Fig. S2.** (a)  $^1\text{H}$  NMR spectrum of  $\text{Eu}[\text{N}(\text{SiMe}_3)_2]_3$  in n-hexane- $d_{14}$ . (b)  $^1\text{H}$  NMR spectrum of the reaction of  $\text{Eu}[\text{N}(\text{SiMe}_3)_2]_3$  with  $\text{CHCl}_3$  (1:1) at room temperature in n-hexane- $d_{14}$ .

**Fig. S3.** (a)  $^{13}\text{C}$  NMR spectrum of  $\text{Eu}[\text{N}(\text{SiMe}_3)_2]_3$  in n-hexane- $d_{14}$ . (b)  $^{13}\text{C}$  NMR spectrum of the reaction of  $\text{Eu}[\text{N}(\text{SiMe}_3)_2]_3$  with  $\text{CHCl}_3$  (1:1) at room temperature in n-hexane- $d_{14}$ .

**Fig. S4.** Experimental and calculated PXRD patterns for  $[\text{Eu}\{\text{N}(\text{SiMe}_3)_2\}_2(\mu\text{-Cl})(\text{NCSiMe}_3)]_2$ .

**Fig. S5.** Experimental and calculated PXRD patterns for  $[\text{Sm}\{\text{N}(\text{SiMe}_3)_2\}_2(\mu\text{-Cl})(\text{NCSiMe}_3)]_2$ .

**Fig. S6.** Experimental and calculated PXRD patterns for  $\text{Yb}[\text{N}(\text{SiMe}_3)_2]_3 (\text{NCSiMe}_3)_2$ .

**Fig. S7.** FTIR spectra of complex **1** (black), complex **2** (red) and complex **3** (blue)

**Fig. S8.** UV-visible absorption spectra of complex **1** in n-hexane

**Table S1.** Crystal data and structure refinements for complexes **1**, **2** and **3**.

### III. References

## I. Experimental Procedures

### General information

All reactions were carried out using modified Schlenk-line and Ar-atmosphere glove box (<1 ppm O<sub>2</sub>/H<sub>2</sub>O) techniques. n-Hexane and THF dried and degassed through a Vigor solvent purification system as well as CDCl<sub>3</sub> and CHCl<sub>3</sub> were stored over 4 Å sieves for 24 h under argon atmosphere before use. C<sub>6</sub>D<sub>6</sub> were dried over Na and stored under argon atmosphere prior to use. n-Hexane-*d*<sub>14</sub> and styrene (carbene trapping reagent) are used without purification. Ln[N(SiMe<sub>3</sub>)<sub>2</sub>]<sub>3</sub> (Ln=Eu, Sm, Yb) was synthesized according to the literature methods.<sup>1</sup> Elemental analyses (C, H, N) were performed on a Vario EL III elemental analyser. The powder X-ray diffraction patterns were collected on a Rigaku Synergy R (Cu Kα) diffractometer at 180 K. The powder wrapped in inert oil was cooled under a cold stream of nitrogen, and CrysAlisPro software was used for data collection and integration. All NMR spectra were recorded on a Zhongke-Niujin Quantum-I Plus 400 spectrometer (Zhongke-Niujin, Wuhan, China). <sup>1</sup>H and <sup>13</sup>C NMR chemical shifts (δ) are reported in ppm and were calibrated to residual solvent peaks (C<sub>6</sub>D<sub>6</sub>) or TMS (n-hexane-*d*<sub>14</sub>). Due to the paramagnetic nature of trivalent europium, samarium and ytterbium, conclusive <sup>1</sup>H and <sup>13</sup>C NMR data of compounds **1-3** could not be obtained. The solution magnetic susceptibilities of **1-3** were determined by the Evans method in C<sub>6</sub>D<sub>6</sub>.<sup>2</sup> The FTIR samples were prepared as KBr pellets, and the spectra were obtained on a Nalay-50 spectrometer (Nuoleixinda, Tianjin, China). The UV-vis spectra were recorded on a Cary 6000i Agilent spectrophotometer.

## X-ray Crystallography

The intensity data were collected on a Rigaku Synergy R (Mo K $\alpha$ ) diffractometer at 180 K. Absorption corrections were applied by using the program CrysAlisPro (multi-scan). The crystal structures were solved by SHELXT structure solution program using Intrinsic Phasing, and nonhydrogen atoms were refined anisotropically by least-squares techniques on  $F^2$  by SHELXL with the graphical user interfaces of Olex2.<sup>3</sup> For all structures, H-atom parameters were constrained.

### Synthesis of [Eu{N(SiMe<sub>3</sub>)<sub>2</sub>}<sub>2</sub>( $\mu$ -Cl)(NCSiMe<sub>3</sub>)]<sub>2</sub> (1)

CDCl<sub>3</sub> (20  $\mu$ l, 0.25 mmol) was added to a solution of Eu[N(SiMe<sub>3</sub>)<sub>2</sub>]<sub>3</sub> (158.3 mg, 0.25 mmol) in n-hexane (4 mL) at room temperature. The color of the mixture changed into red, and a purple precipitate was observed within 20 min. After filtration, solvent volatilized slowly at room temperature. The resulting dark red solid was washed three times by n-hexane and dried in vacuum. Yield: 36 mg, 47.4% based on Eu[N(SiMe<sub>3</sub>)<sub>2</sub>]<sub>3</sub>. Anal. Calcd (%) for C<sub>32</sub>H<sub>90</sub>Cl<sub>2</sub>N<sub>6</sub>Si<sub>10</sub>Eu<sub>2</sub>: C, 31.64; H, 7.47; N, 6.92. Found: C, 30.12; H, 7.24; N, 6.47.  $\mu_{\text{eff}}$  = 4.99  $\mu_B$  (Evans method). FTIR (KBr, cm<sup>-1</sup>):  $\nu(\text{C}\equiv\text{N})$ , 2197 and 2129. Powder X-ray diffraction was used to confirm the purity of the bulk samples.

### Synthesis of [Sm{N(SiMe<sub>3</sub>)<sub>2</sub>}<sub>2</sub>( $\mu$ -Cl)(NCSiMe<sub>3</sub>)]<sub>2</sub> (2)

CDCl<sub>3</sub> (20  $\mu$ l, 0.25 mmol) was added to a solution of Sm[N(SiMe<sub>3</sub>)<sub>2</sub>]<sub>3</sub> (158.1 mg, 0.25 mmol) in n-hexane (4 mL) at room temperature. A few white precipitate was observed within 20 min. After filtration, solvent volatilized slowly at room temperature. The resulting ivory solid was washed three times by n-hexane and dried in vacuum. Yield:

43 mg, 56.8% based on  $\text{Sm}[\text{N}(\text{SiMe}_3)_2]_3$ . Anal. Calcd (%) for  $\text{C}_{32}\text{H}_{90}\text{Cl}_2\text{N}_6\text{Si}_{10}\text{Sm}_2$ : C, 31.72; H, 7.49; N, 6.94. Found: C, 31.83; H, 7.58; N, 6.90.  $\mu_{\text{eff}} = 1.71 \mu_{\text{B}}$  (Evans method). FTIR (KBr,  $\text{cm}^{-1}$ ):  $\nu(\text{C}\equiv\text{N})$ , 2197 and 2128. Powder X-ray diffraction was used to confirm the purity of the bulk samples.

### **Synthesis of $\text{Yb}[\text{N}(\text{SiMe}_3)_2]_3(\text{NCSiMe}_3)_2$ (3)**

$\text{CDCl}_3$  (20  $\mu\text{L}$ , 0.25 mmol) was added to a solution of  $\text{Yb}[\text{N}(\text{SiMe}_3)_2]_3$  (163.8 mg, 0.25 mmol) in n-hexane (5 mL) at room temperature. The color of the mixture faded, and an earth-yellow precipitate was observed within 20 min. Filtrating the mixture, the filtrate was stored at  $-25^\circ\text{C}$  to afford colorless crystals. Yield: 36 mg, 33.8% based on  $\text{Yb}[\text{N}(\text{SiMe}_3)_2]_3$ . Anal. Calcd (%) for  $\text{C}_{26}\text{H}_{72}\text{N}_5\text{Si}_8\text{Yb}$ : C, 36.63; H, 8.51; N, 8.21. Found: C, 36.70; H, 8.53; N, 7.38.  $\mu_{\text{eff}} = 4.47 \mu_{\text{B}}$  (Evans method). FTIR (KBr,  $\text{cm}^{-1}$ ):  $\nu(\text{C}\equiv\text{N})$ , 2136. Powder X-ray diffraction was used to confirm the purity of the bulk samples.

## II. Characterization

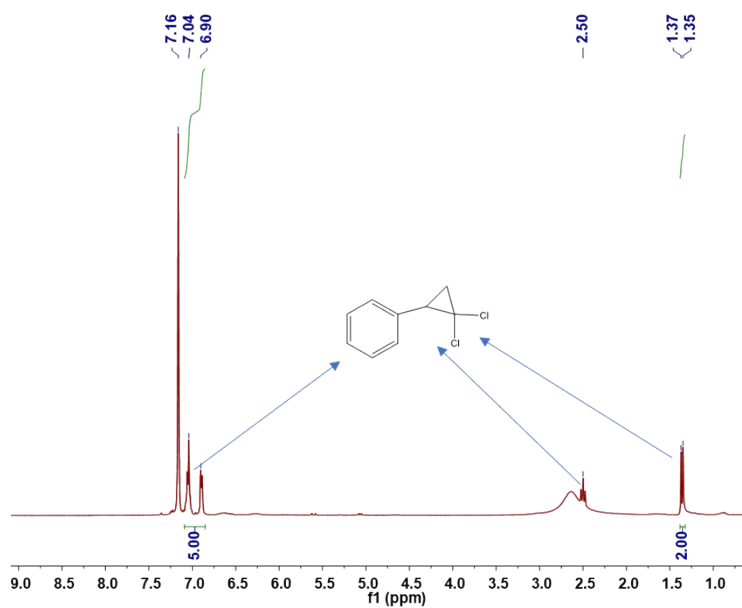

**Fig. S1.**  $^1\text{H}$  NMR ( $\text{C}_6\text{D}_6$ ) spectrum of the reaction products of  $\text{Eu}[\text{N}(\text{SiMe}_3)_2]_3$  with styrene and  $\text{CDCl}_3$  (1:1:1) at room temperature in n-hexane. The reaction mixture was filtered and the solvent was removed before the reaction products were dissolved in  $\text{C}_6\text{D}_6$ .

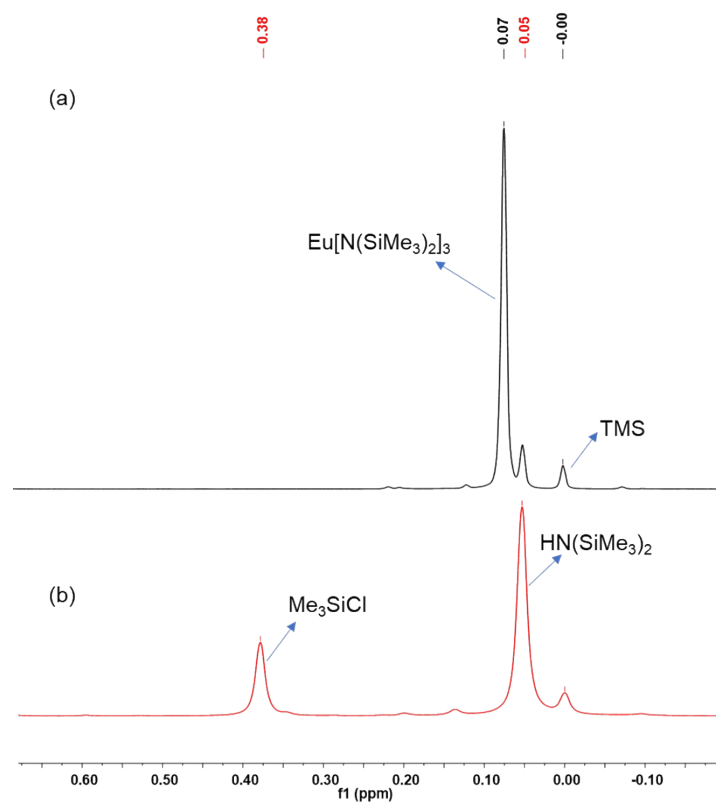

**Fig. S2.** (a)  $^1\text{H}$  NMR spectrum of  $\text{Eu}[\text{N}(\text{SiMe}_3)_2]_3$  in  $n\text{-hexane-}d_{14}$ . (b)  $^1\text{H}$  NMR spectrum of the reaction of  $\text{Eu}[\text{N}(\text{SiMe}_3)_2]_3$  with  $\text{CHCl}_3$  (1:1) at room temperature in  $n\text{-hexane-}d_{14}$ .

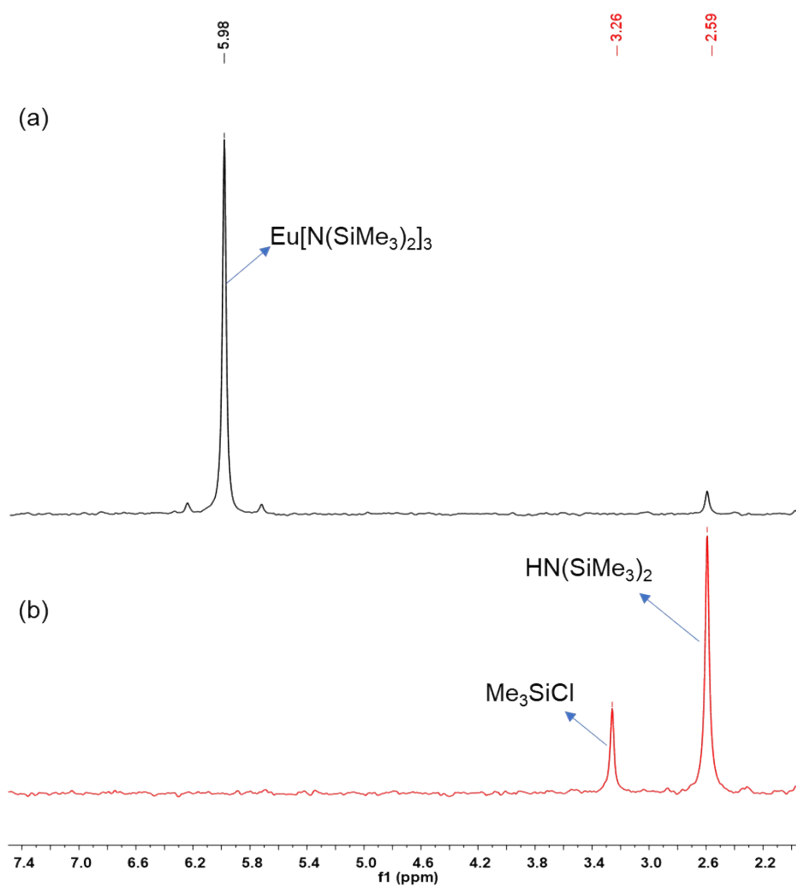

**Fig. S3.** (a)  $^{13}\text{C}$  NMR spectrum of  $\text{Eu}[\text{N}(\text{SiMe}_3)_2]_3$  in  $n\text{-hexane-}d_{14}$ . (b)  $^{13}\text{C}$  NMR spectrum of the reaction of  $\text{Eu}[\text{N}(\text{SiMe}_3)_2]_3$  with  $\text{CHCl}_3$  (1:1) at room temperature in  $n\text{-hexane-}d_{14}$ .

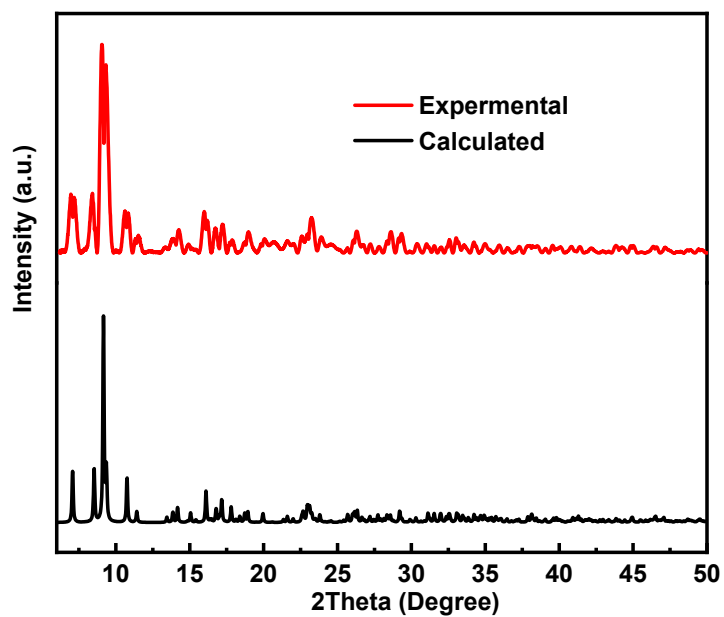

**Fig. S4.** Experimental and calculated PXRD patterns for  $[\text{Eu}\{\text{N}(\text{SiMe}_3)_2\}_2(\mu\text{-Cl})(\text{NCSiMe}_3)]_2$ .

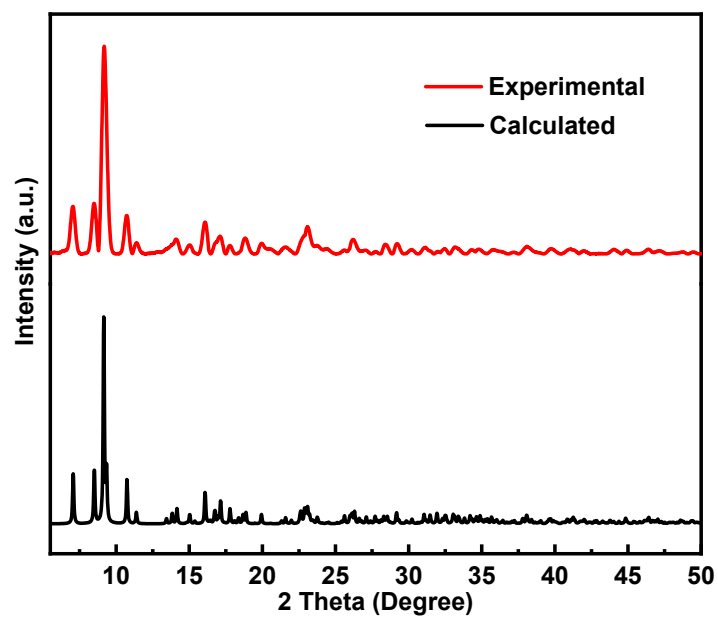

**Fig. S5.** Experimental and calculated PXRD patterns for  $[\text{Sm}\{\text{N}(\text{SiMe}_3)_2\}_2(\mu\text{-Cl})(\text{NCSiMe}_3)]_2$ .

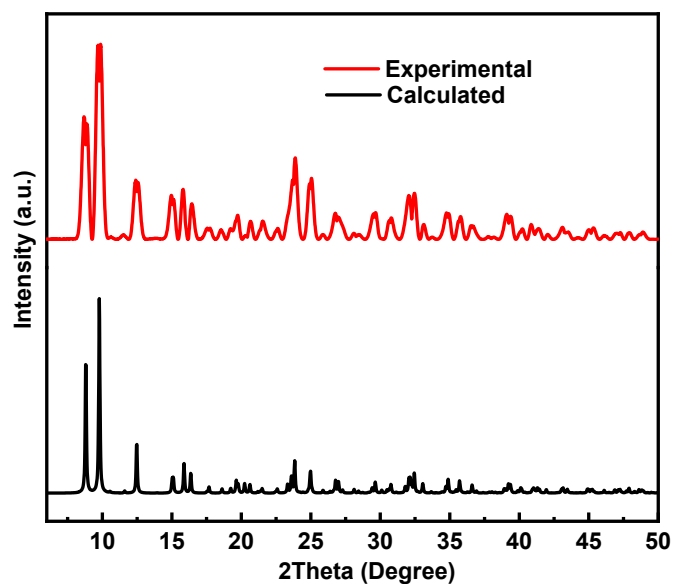

**Fig. S6.** Experimental and calculated PXRD patterns for  $\text{Yb}[\text{N}(\text{SiMe}_3)_2]_3(\text{NCSiMe}_3)_2$ .

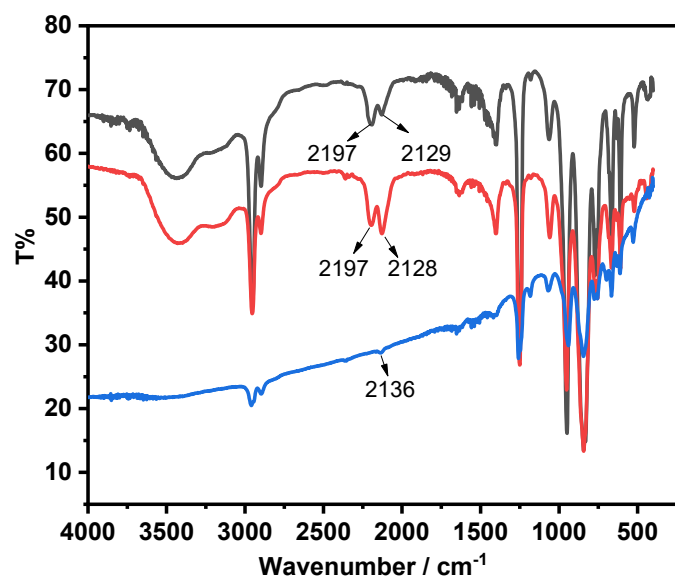

**Fig. S7.** FTIR spectra of complex **1** (black), **2** (red) and **3** (blue).

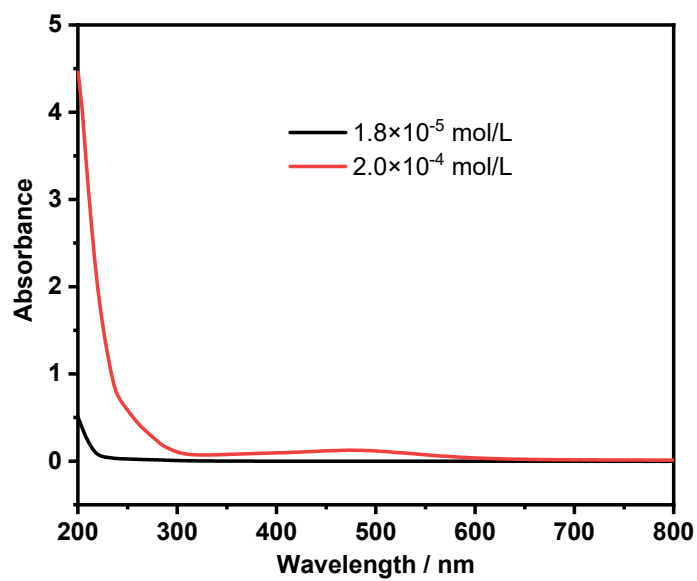

**Fig. S8.** UV-visible absorption spectra of complex **1** in n-hexane.

**Table S1.** Crystal data and structure refinements for complexes **1**, **2** and **3**

| Complex                          | 1                                                                                               | 2                                                                                               | 3                                                                 |
|----------------------------------|-------------------------------------------------------------------------------------------------|-------------------------------------------------------------------------------------------------|-------------------------------------------------------------------|
| CCDC                             | 2144893                                                                                         | 2189910                                                                                         | 2144894                                                           |
| Empirical formula                | C <sub>32</sub> H <sub>90</sub> Cl <sub>2</sub> N <sub>6</sub> Si <sub>10</sub> Eu <sub>2</sub> | C <sub>32</sub> H <sub>90</sub> Cl <sub>2</sub> N <sub>6</sub> Si <sub>10</sub> Sm <sub>2</sub> | C <sub>26</sub> H <sub>72</sub> N <sub>5</sub> Si <sub>8</sub> Yb |
| Formula weight                   | 1214.81                                                                                         | 1211.59                                                                                         | 852.64                                                            |
| Temperature/K                    | 180(2)                                                                                          | 179.99(10)                                                                                      | 180 (2)                                                           |
| Crystal system                   | monoclinic                                                                                      | monoclinic                                                                                      | tetragonal                                                        |
| Space group                      | C2/c                                                                                            | C2/c                                                                                            | I4 <sub>1</sub> cd                                                |
| a /Å                             | 20.7513(4)                                                                                      | 20.8019(3)                                                                                      | 20.0586(3)                                                        |
| b/Å                              | 11.9059(2)                                                                                      | 11.9155(2)                                                                                      | 20.0586(3)                                                        |
| c/Å                              | 25.0124(4)                                                                                      | 25.0378(4)                                                                                      | 23.4376(5)                                                        |
| $\alpha$ /°                      | 90                                                                                              | 90                                                                                              | 90                                                                |
| $\beta$ /°                       | 93.4704(16)                                                                                     | 93.368(2)                                                                                       | 90                                                                |
| $\gamma$ /°                      | 90                                                                                              | 90                                                                                              | 90                                                                |
| Volume/Å <sup>3</sup>            | 6168.30(19)                                                                                     | 6195.28(17)                                                                                     | 9430.1(3)                                                         |
| Z                                | 4                                                                                               | 4                                                                                               | 8                                                                 |
| $\rho_{\text{calc}}/\text{cm}^3$ | 1.308                                                                                           | 1.299                                                                                           | 1.201                                                             |
| $\mu/\text{mm}^{-1}$             | 2.321                                                                                           | 2.182                                                                                           | 2.208                                                             |
| F(000)                           | 2496.0                                                                                          | 2488.0                                                                                          | 3560.0                                                            |
| 2 $\theta$ range/deg             | 3.932 to 56.564                                                                                 | 3.922 to 62.204                                                                                 | 4.062 to 52.738                                                   |
| Index ranges                     | -26 ≤ h ≤ 27                                                                                    | -27 ≤ h ≤ 26                                                                                    | -23 ≤ h ≤ 24                                                      |
|                                  | -15 ≤ k ≤ 15                                                                                    | -16 ≤ k ≤ 13                                                                                    | -24 ≤ k ≤ 24                                                      |

|                                                |                             |                             |                             |
|------------------------------------------------|-----------------------------|-----------------------------|-----------------------------|
|                                                | $-31 \leq l \leq 33$        | $-35 \leq l \leq 31$        | $-29 \leq l \leq 29$        |
| Reflections collected                          | 35817                       | 37264                       | 24214                       |
|                                                | 7328                        | 8020                        | 4540                        |
| Independent reflections                        | $R_{\text{int}} = 0.0250$   | $R_{\text{int}} = 0.0237$   | $R_{\text{int}} = 0.0309$   |
|                                                | $R_{\text{sigma}} = 0.0187$ | $R_{\text{sigma}} = 0.0185$ | $R_{\text{sigma}} = 0.0236$ |
| Completeness                                   | 99.6%                       | 100%                        | 99.9%                       |
| Data/restraints/parameters                     | 7328/0/250                  | 8020/0/250                  | 4540/1/194                  |
| Goodness-of-fit on $F^2$                       | 1.035                       | 1.054                       | 1.051                       |
| Final R indexes [ $I \geq 2\sigma(I)$ ]        | $R_1 = 0.0187$              | $R_1 = 0.0201$              | $R_1 = 0.0225$              |
|                                                | $wR_2 = 0.0417$             | $wR_2 = 0.0435$             | $wR_2 = 0.0556$             |
| Final R indexes [all data]                     | $R_1 = 0.0229$              | $R_1 = 0.0238$              | $R_1 = 0.0308$              |
|                                                | $wR_2 = 0.0429$             | $wR_2 = 0.0445$             | $wR_2 = 0.0611$             |
| Largest diff. peak/hole / $e \text{ \AA}^{-3}$ | 0.58/-0.30                  | 0.37/-0.45                  | 0.58/-0.53                  |

### III. References

1. D. C. Bradley, J. S. Ghotra, F. A. Hart, *J. Chem. Soc., Dalton Trans.*, 1973, 1021.
2. (a) D. F. Evans, *J. Chem. Soc.*, 1959, 2003; (b) E. M. Schubert, *J. Chem. Educ.*, 1992, **69**, 62; (c) S. K. Sur, *J. Magn. Reson.*, 1989, **82**, 169–173.
3. (a) O. V. Dolomanov, L. J. Bourhis, R. J. Gildea, J. A. K. Howard and H. Puschmann, *J. Appl. Crystallogr.*, 2009, **42**, 339; (b) G. Sheldrick, *Acta Crystallogr. Section A*, 2015, **71**, 3; (c) G. M. Sheldrick, *Acta Crystallogr. Section C*, 2015, **71**, 3.
